# Supplementary material for: On the σ, π and δ hole interactions: a molecular orbital overview
Source: Royal Society of Chemistry journal article supplement (doi:10.1039/c7nj03632a), 2017-12-18
Supplement: c7nj03632a1.pdf [file c7nj03632a1.pdf]

Electronic Supplementary Information for

## On the $\sigma$ , $\pi$ and $\delta$ hole interactions: a molecular orbital overview

V. Angarov, S. Kozuch

|                                                        |           |           |           |                                            |           |           |           |
|--------------------------------------------------------|-----------|-----------|-----------|--------------------------------------------|-----------|-----------|-----------|
| <b>FI</b>                                              |           |           |           | <b>F<sub>2</sub>C=CF<sub>2</sub></b>       |           |           |           |
| I                                                      | 0.000000  | 0.000000  | 0.276060  | C                                          | -0.000000 | -0.000000 | 0.660064  |
| F                                                      | 0.000000  | 0.000000  | -1.625686 | C                                          | 0.000000  | -0.000000 | -0.660064 |
|                                                        |           |           |           | F                                          | 0.000000  | 1.094504  | 1.380618  |
| <b>NCH</b>                                             |           |           |           | F                                          | -0.000000 | -1.094504 | 1.380618  |
| N                                                      | 0.000000  | 0.000000  | 0.649744  | F                                          | 0.000000  | 1.094504  | -1.380618 |
| C                                                      | 0.000000  | 0.000000  | -0.497279 | F                                          | -0.000000 | -1.094504 | -1.380618 |
| H                                                      | 0.000000  | 0.000000  | -1.564535 |                                            |           |           |           |
| <b>FI - NCH</b>                                        |           |           |           | <b>F<sub>2</sub>C=CF<sub>2</sub> - NCH</b> |           |           |           |
| N                                                      | 0.000000  | 0.000000  | -2.192127 | C                                          | -0.462191 | -0.696349 | 0.000259  |
| C                                                      | 0.000000  | 0.000000  | -3.335815 | C                                          | -1.298580 | 0.323689  | 0.000027  |
| H                                                      | 0.000000  | 0.000000  | -4.403814 | N                                          | 2.389650  | 0.487626  | -0.000538 |
| I                                                      | 0.000000  | 0.000000  | 0.361019  | C                                          | 3.506613  | 0.746115  | -0.000609 |
| F                                                      | 0.000000  | 0.000000  | 2.292177  | H                                          | 4.546153  | 0.987162  | 0.000932  |
|                                                        |           |           |           | F                                          | -0.008987 | -1.253776 | 1.094628  |
| <b>H<sub>2</sub>C=O</b>                                |           |           |           | F                                          | -0.009226 | -1.254437 | -1.093888 |
| C                                                      | -0.000000 | 0.000000  | -0.527028 | F                                          | -1.754606 | 0.885491  | 1.095069  |
| H                                                      | 0.000000  | 0.938017  | -1.109367 | F                                          | -1.754821 | 0.884803  | -1.095279 |
| H                                                      | -0.000000 | -0.938017 | -1.109367 |                                            |           |           |           |
| O                                                      | 0.000000  | -0.000000 | 0.672613  | <b>MeI</b>                                 |           |           |           |
|                                                        |           |           |           | C                                          | 0.000000  | 0.000000  | -1.803497 |
| <b>H<sub>2</sub>C=O - NCH / C<sub>2v</sub></b>         |           |           |           | H                                          | 0.000000  | 1.031161  | -2.138498 |
| C                                                      | 0.000000  | 0.000000  | 1.555359  | H                                          | 0.893012  | -0.515581 | -2.138498 |
| O                                                      | 0.000000  | 0.000000  | 2.756780  | H                                          | -0.893012 | -0.515581 | -2.138498 |
| H                                                      | -0.000000 | 0.933331  | 0.966613  | I                                          | 0.000000  | 0.000000  | 0.325216  |
| H                                                      | -0.000000 | -0.933331 | 0.966613  |                                            |           |           |           |
| N                                                      | 0.000000  | -0.000000 | -1.730450 | <b>CN<sup>-</sup></b>                      |           |           |           |
| C                                                      | 0.000000  | -0.000000 | -2.876997 | N                                          | 0.000000  | 0.000000  | 0.541405  |
| H                                                      | 0.000000  | -0.000000 | -3.944490 | C                                          | 0.000000  | 0.000000  | -0.631639 |
|                                                        |           |           |           |                                            |           |           |           |
| <b>H<sub>2</sub>C=O - NCH / C<sub>s</sub></b>          |           |           |           | <b>MeI - CN<sup>-</sup></b>                |           |           |           |
| C                                                      | -0.771819 | -1.380276 | 0.000000  | C                                          | 0.000000  | 0.000000  | 2.503422  |
| O                                                      | 0.044419  | -2.261767 | 0.000000  | H                                          | -0.000000 | 1.026951  | 2.864530  |
| H                                                      | -1.168210 | -0.950038 | 0.935325  | H                                          | -0.889365 | -0.513475 | 2.864530  |
| H                                                      | -1.168210 | -0.950038 | -0.935325 | H                                          | 0.889365  | -0.513475 | 2.864530  |
| N                                                      | 0.000000  | 1.573842  | 0.000000  | I                                          | 0.000000  | 0.000000  | 0.311120  |
| C                                                      | 0.833486  | 2.361092  | 0.000000  | C                                          | 0.000000  | 0.000000  | -2.455948 |
| H                                                      | 1.611067  | 3.092417  | 0.000000  | N                                          | 0.000000  | 0.000000  | -3.623972 |
|                                                        |           |           |           |                                            |           |           |           |
| <b>H<sub>2</sub>C=O - NCH / C<sub>s</sub> - H bond</b> |           |           |           | <b>F<sub>2</sub>C=O</b>                    |           |           |           |
| C                                                      | 0.442796  | -2.381483 | -0.000000 | C                                          | 0.000000  | 0.000000  | 0.139775  |
| O                                                      | 0.817392  | -1.238423 | -0.000000 | F                                          | -0.000000 | 1.057198  | -0.629630 |
| H                                                      | -0.628283 | -2.641382 | -0.000000 | F                                          | -0.000000 | -1.057198 | -0.629630 |
| H                                                      | 1.158383  | -3.219163 | -0.000000 | O                                          | 0.000000  | 0.000000  | 1.311837  |
| N                                                      | -0.984820 | 2.729308  | 0.000000  |                                            |           |           |           |
| C                                                      | -0.472046 | 1.702380  | 0.000000  | <b>F<sub>2</sub>C=O - CN<sup>-</sup></b>   |           |           |           |
| H                                                      | -0.000000 | 0.737393  | 0.000000  | C                                          | 0.381860  | 0.188185  | 0.000000  |
|                                                        |           |           |           | F                                          | 0.793221  | -0.633464 | 1.098117  |
| <b>H<sub>2</sub>C=CH<sub>2</sub></b>                   |           |           |           | F                                          | 0.793221  | -0.633464 | -1.098117 |
| C                                                      | -0.000000 | -0.000000 | 0.662335  | O                                          | 0.793221  | 1.343026  | 0.000000  |
| C                                                      | 0.000000  | -0.000000 | -0.662335 | C                                          | -1.142308 | -0.005323 | 0.000000  |
| H                                                      | 0.000000  | 0.921990  | 1.230869  | N                                          | -2.294438 | -0.062717 | 0.000000  |
| H                                                      | -0.000000 | -0.921990 | 1.230869  |                                            |           |           |           |
| H                                                      | 0.000000  | 0.921990  | -1.230869 | <b>BrI</b>                                 |           |           |           |
| H                                                      | -0.000000 | -0.921990 | -1.230869 | I                                          | 0.000000  | 0.000000  | 0.981466  |
|                                                        |           |           |           | Br                                         | 0.000000  | 0.000000  | -1.486220 |

**BrI - CN<sup>-</sup>**

|    |          |          |           |
|----|----------|----------|-----------|
| I  | 0.000000 | 0.000000 | 0.656538  |
| Br | 0.000000 | 0.000000 | -2.255900 |
| C  | 0.000000 | 0.000000 | 2.772930  |
| N  | 0.000000 | 0.000000 | 3.931771  |

**H<sub>2</sub>C=Te**

|    |           |           |           |
|----|-----------|-----------|-----------|
| C  | 0.000000  | 0.000000  | -1.660748 |
| H  | 0.000000  | 0.920183  | -2.233768 |
| H  | -0.000000 | -0.920183 | -2.233768 |
| Te | 0.000000  | -0.000000 | 0.277539  |

**H<sub>2</sub>C=Te - NCH / C<sub>2v</sub>**

|    |           |           |           |
|----|-----------|-----------|-----------|
| C  | -0.000000 | 0.000000  | 2.497580  |
| H  | -0.000000 | 0.918306  | 3.074745  |
| H  | -0.000000 | -0.918306 | 3.074745  |
| Te | -0.000000 | 0.000000  | 0.555490  |
| N  | 0.000000  | 0.000000  | -2.923376 |
| C  | 0.000000  | 0.000000  | -4.069924 |
| H  | 0.000000  | 0.000000  | -5.137295 |

**H<sub>2</sub>C=Te - NCH / C<sub>s</sub>**

|    |           |           |           |
|----|-----------|-----------|-----------|
| C  | 0.546516  | 0.873859  | 0.000000  |
| Te | 0.571464  | -1.093282 | 0.000000  |
| N  | -2.413603 | 1.652364  | 0.000000  |
| C  | -3.553710 | 1.531789  | 0.000000  |
| H  | -4.615025 | 1.419026  | 0.000000  |
| F  | 0.546516  | 1.635066  | 1.051866  |
| F  | 0.546516  | 1.635066  | -1.051866 |

**F<sub>2</sub>C=Te**

|    |           |           |           |
|----|-----------|-----------|-----------|
| C  | 0.000000  | -0.000000 | -1.161465 |
| F  | -0.000000 | 1.052315  | -1.928323 |
| F  | -0.000000 | -1.052315 | -1.928323 |
| Te | -0.000000 | 0.000000  | 0.801511  |

**F<sub>2</sub>C=Te - NCH / C<sub>2v</sub>**

|    |           |           |           |
|----|-----------|-----------|-----------|
| C  | 0.000000  | 0.000000  | 1.896510  |
| F  | 0.000000  | 1.052078  | 2.669767  |
| F  | 0.000000  | -1.052078 | 2.669767  |
| Te | -0.000000 | 0.000000  | -0.075258 |
| N  | -0.000000 | 0.000000  | -3.316520 |
| C  | -0.000000 | 0.000000  | -4.462617 |
| H  | -0.000000 | 0.000000  | -5.530100 |

**F<sub>2</sub>C=Te - NCH / C<sub>s</sub>**

|    |           |           |           |
|----|-----------|-----------|-----------|
| C  | 0.546516  | 0.873859  | 0.000000  |
| Te | 0.571464  | -1.093282 | 0.000000  |
| N  | -2.413603 | 1.652364  | 0.000000  |
| C  | -3.553710 | 1.531789  | 0.000000  |
| H  | -4.615025 | 1.419026  | 0.000000  |
| F  | 0.546516  | 1.635066  | 1.051866  |
| F  | 0.546516  | 1.635066  | -1.051866 |

**TFDTE**

|   |           |           |           |
|---|-----------|-----------|-----------|
| S | 0.000000  | 1.353767  | 0.000000  |
| S | -0.000000 | -1.353767 | 0.000000  |
| F | 1.996611  | -0.000000 | 1.067868  |
| F | 1.996611  | 0.000000  | -1.067868 |
| F | -1.996611 | -0.000000 | -1.067868 |
| F | -1.996611 | 0.000000  | 1.067868  |
| C | -1.191313 | 0.000000  | 0.000000  |
| C | 1.191313  | -0.000000 | 0.000000  |

**TFDTE - NCH**

|   |           |           |           |
|---|-----------|-----------|-----------|
| S | -0.892311 | -0.488648 | 0.000000  |
| S | 1.815340  | -0.482005 | 0.000000  |
| F | 0.469683  | 1.512649  | 1.068594  |
| F | 0.469683  | 1.512649  | -1.068594 |
| F | 0.469683  | -2.483660 | -1.067972 |
| F | 0.469683  | -2.483660 | 1.067972  |
| C | 0.463367  | -1.673110 | 0.000000  |
| C | 0.457326  | 0.708796  | 0.000000  |
| N | -2.323399 | 2.214265  | 0.000000  |
| C | -2.912798 | 3.196952  | 0.000000  |
| H | -3.460643 | 4.112973  | 0.000000  |

**S<sub>2</sub>O<sub>2</sub> / D<sub>2h</sub>**

|   |           |           |           |
|---|-----------|-----------|-----------|
| S | 0.000000  | 0.000000  | 1.220193  |
| S | 0.000000  | 0.000000  | -1.220193 |
| O | 0.000000  | 1.147099  | 0.000000  |
| O | -0.000000 | -1.147099 | 0.000000  |

**S<sub>2</sub>O<sub>2</sub> / C<sub>2v</sub>**

|   |           |           |           |
|---|-----------|-----------|-----------|
| S | -0.000000 | 1.179686  | -0.129673 |
| S | -0.000000 | -1.179686 | -0.129673 |
| O | 1.122055  | -0.000000 | 0.259347  |
| O | -1.122055 | 0.000000  | 0.259347  |

**S<sub>2</sub>O<sub>2</sub> - NCH / C<sub>s</sub>**

|   |           |           |           |
|---|-----------|-----------|-----------|
| S | -0.159918 | -0.866127 | -0.000000 |
| S | -1.651264 | 1.080879  | -0.000000 |
| O | -1.827086 | -0.571623 | -0.000000 |
| O | 0.000000  | 0.808558  | 0.000000  |
| N | 2.479709  | -0.516935 | 0.000000  |
| C | 3.599190  | -0.276935 | 0.000000  |
| H | 4.642499  | -0.051362 | 0.000000  |

**S(CF<sub>2</sub>)<sub>2</sub> - NCH**

|   |           |           |           |
|---|-----------|-----------|-----------|
| S | 1.101861  | -0.695910 | 0.000000  |
| C | -0.512356 | -1.441176 | 0.000000  |
| C | -0.512512 | 0.040626  | 0.000000  |
| F | -0.929369 | -2.088035 | 1.084010  |
| F | -0.929369 | -2.088035 | -1.084010 |
| F | -0.929369 | 0.683645  | 1.084156  |
| F | -0.929369 | 0.683645  | -1.084156 |
| N | 1.461283  | 2.560971  | 0.000000  |
| C | 1.653020  | 3.691070  | 0.000000  |
| H | 1.829623  | 4.743653  | 0.000000  |

**S(CF<sub>2</sub>)<sub>3</sub> - NCH**

|   |           |           |           |
|---|-----------|-----------|-----------|
| S | 1.174503  | -0.466403 | 0.000000  |
| F | -0.295185 | 1.469138  | 1.076564  |
| F | -0.295185 | 1.469138  | -1.076564 |
| F | -2.031274 | -0.461736 | -1.085783 |
| F | -2.031274 | -0.461736 | 1.085783  |
| F | -0.295185 | -2.398967 | -1.076308 |
| F | -0.295185 | -2.398967 | 1.076308  |
| C | -1.263458 | -0.462420 | 0.000000  |
| C | -0.212313 | 0.688390  | 0.000000  |
| C | -0.214885 | -1.612416 | 0.000000  |
| N | 2.466616  | 2.333746  | 0.000000  |
| C | 2.972206  | 3.362074  | 0.000000  |
| H | 3.441935  | 4.320601  | 0.000000  |

**S (CF<sub>2</sub>)<sub>4</sub> - NCH**

|   |           |           |           |
|---|-----------|-----------|-----------|
| S | -0.692161 | -1.179105 | -0.259427 |
| F | 0.783877  | 2.346009  | 0.407975  |
| F | 0.968914  | 1.301310  | -1.492937 |
| F | -1.554396 | 1.167078  | -1.018228 |
| F | -1.284198 | 0.968690  | 1.113269  |
| F | 1.412836  | 0.112578  | 1.748234  |
| F | 2.861381  | 0.340695  | 0.137747  |
| F | 1.487382  | -2.247887 | 0.655091  |
| F | 1.682680  | -1.450015 | -1.338402 |
| C | 0.660890  | 1.167927  | -0.198676 |
| C | -0.784181 | 0.617946  | -0.077176 |
| C | 1.581797  | 0.110223  | 0.421491  |
| C | 1.105934  | -1.246211 | -0.145487 |
| N | -3.760096 | -0.632699 | 0.046581  |
| C | -4.881865 | -0.509533 | 0.246120  |
| H | -5.926503 | -0.393659 | 0.432396  |

**S (CF<sub>2</sub>)<sub>5</sub> - NCH**

|   |           |           |           |
|---|-----------|-----------|-----------|
| S | 1.110230  | 1.033298  | 0.052377  |
| F | -2.043220 | -0.943637 | 1.135999  |
| F | -2.400791 | -1.440907 | -0.951201 |
| F | -1.369755 | 0.844463  | -1.781286 |
| F | -2.847196 | 1.172171  | -0.219229 |
| F | -0.947124 | 1.549805  | 1.602258  |
| F | -0.672293 | 2.813043  | -0.141141 |
| F | 0.180868  | -1.468791 | -1.497875 |
| F | -0.265956 | -2.681491 | 0.251465  |
| F | 2.064864  | -1.299984 | 0.368758  |
| F | 0.610228  | -0.772853 | 1.888338  |
| C | -1.588752 | -0.792429 | -0.111167 |
| C | -1.619974 | 0.709066  | -0.475772 |
| C | -0.593757 | 1.555064  | 0.311948  |
| C | -0.185053 | -1.430742 | -0.213527 |
| C | 0.904101  | -0.676846 | 0.586265  |
| N | 4.369749  | 0.668833  | -0.433559 |
| C | 5.476032  | 0.413268  | -0.592369 |
| H | 6.505885  | 0.174744  | -0.740159 |

**SF<sub>2</sub>**

|   |           |           |           |
|---|-----------|-----------|-----------|
| S | -0.000000 | 0.000000  | 0.547911  |
| F | -0.000000 | 1.191769  | -0.487032 |
| F | -0.000000 | -1.191769 | -0.487032 |

**SF<sub>2</sub> - NCH**

|   |           |           |           |
|---|-----------|-----------|-----------|
| S | -0.000000 | -0.852075 | 0.000000  |
| F | -1.324307 | 0.012667  | -0.000000 |
| F | -0.706023 | -2.275969 | 0.000000  |
| N | 1.121246  | 1.806288  | -0.000000 |
| C | 1.446120  | 2.904987  | -0.000000 |
| H | 1.747537  | 3.928988  | -0.000000 |

**SHF**

|   |           |           |          |
|---|-----------|-----------|----------|
| S | 0.051060  | -0.549901 | 0.000000 |
| H | -1.276510 | -0.692608 | 0.000000 |
| F | 0.051060  | 1.054558  | 0.000000 |

**SHF - NCH**

|   |           |           |           |
|---|-----------|-----------|-----------|
| S | -0.000000 | -0.830216 | -0.000000 |
| H | -1.228880 | -0.317257 | -0.000000 |
| F | -0.466396 | -2.378754 | -0.000000 |
| N | 0.174617  | 1.887634  | 0.000000  |
| C | 0.550361  | 2.969726  | 0.000000  |
| H | 0.901958  | 3.977703  | 0.000000  |

**PF<sub>3</sub>**

|   |           |           |           |
|---|-----------|-----------|-----------|
| P | 0.000000  | 0.000000  | 0.500773  |
| F | 0.000000  | 1.353616  | -0.278207 |
| F | -1.172265 | -0.676808 | -0.278207 |
| F | 1.172265  | -0.676808 | -0.278207 |

**PF<sub>3</sub> - NCH**

|   |           |           |           |
|---|-----------|-----------|-----------|
| P | -0.809157 | 0.000052  | 0.428939  |
| F | -2.354919 | -0.001528 | 0.155735  |
| F | -0.455155 | -1.174002 | -0.540391 |
| F | -0.457547 | 1.174849  | -0.540321 |
| N | 2.335724  | 0.002212  | 0.284601  |
| C | 3.451066  | -0.001023 | 0.020770  |
| H | 4.489471  | -0.004003 | -0.226106 |

**P (CF<sub>2</sub>)<sub>3</sub>CH**

|   |           |           |           |
|---|-----------|-----------|-----------|
| P | 0.000000  | 0.000000  | 1.340505  |
| C | 0.000000  | 1.270739  | -0.084567 |
| C | -1.100492 | -0.635369 | -0.084567 |
| C | 1.100492  | -0.635369 | -0.084567 |
| C | 0.000000  | 0.000000  | -0.954201 |
| F | 1.252742  | -1.959180 | -0.200296 |
| F | 2.323071  | -0.105317 | -0.200296 |
| F | 1.070328  | 2.064497  | -0.200296 |
| F | -1.070328 | 2.064497  | -0.200296 |
| F | -2.323071 | -0.105317 | -0.200296 |
| F | -1.252742 | -1.959180 | -0.200296 |
| H | 0.000000  | 0.000000  | -2.044159 |

**P (CF<sub>2</sub>)<sub>3</sub>CH - NCH**

|   |           |           |           |
|---|-----------|-----------|-----------|
| P | -1.114004 | -0.005933 | 0.000000  |
| C | -0.329091 | -1.746119 | -0.000000 |
| C | 0.449814  | -0.007617 | 1.099601  |
| C | 0.449814  | -0.007617 | -1.099601 |
| C | 0.982004  | -0.944819 | -0.000000 |
| F | 1.115870  | 1.141241  | -1.257667 |
| F | 0.333727  | -0.540830 | -2.323590 |
| F | -0.544016 | -2.523717 | -1.070869 |
| F | -0.544016 | -2.523717 | 1.070869  |
| F | 0.333727  | -0.540830 | 2.323590  |
| F | 1.115870  | 1.141241  | 1.257667  |
| H | 1.978608  | -1.387289 | -0.000000 |
| N | -0.882873 | 3.097488  | 0.000000  |
| C | -0.697321 | 4.228273  | 0.000000  |
| H | -0.520212 | 5.280777  | 0.000000  |

**Mo<sub>2</sub>**

|    |          |          |           |
|----|----------|----------|-----------|
| Mo | 0.000000 | 0.000000 | 0.941318  |
| Mo | 0.000000 | 0.000000 | -0.941318 |

**Mo<sub>2</sub> - Rn / C<sub>s</sub>**

|    |           |           |          |
|----|-----------|-----------|----------|
| Mo | 1.834312  | 2.028168  | 0.000000 |
| Mo | 0.000000  | 1.591359  | 0.000000 |
| Rn | -0.895827 | -1.767676 | 0.000000 |

**Mo<sub>2</sub> - Rn / C<sub>∞v</sub>**

|    |          |          |           |
|----|----------|----------|-----------|
| Mo | 0.000000 | 0.000000 | -1.559141 |
| Mo | 0.000000 | 0.000000 | -3.443543 |
| Rn | 0.000000 | 0.000000 | 2.443171  |

**Tc<sub>2</sub>**

|    |          |          |           |
|----|----------|----------|-----------|
| Tc | 0.000000 | 0.000000 | 0.951634  |
| Tc | 0.000000 | 0.000000 | -0.951634 |

**Tc<sub>2</sub> - Rn**

|    |           |           |          |
|----|-----------|-----------|----------|
| Tc | 0.000000  | 1.431305  | 0.000000 |
| Tc | 1.837285  | 1.949245  | 0.000000 |
| Rn | -0.918643 | -1.690275 | 0.000000 |
